# Supplementary material for: Medical cannabis for orthopaedic patients with chronic musculoskeletal pain: does evidence support its use?
Source: PubMed Central journal article supplement — Ther Adv Musculoskelet Dis. 2020 Jul 2;12:1759720X20937968. doi: 10.1177/1759720X20937968 (PMC7333482; doi:10.1177/1759720x20937968), 2020-07-02
Supplement: TAB937968_Supplemental_Material_CLN.pdf [file TAB937968_Supplemental_Material_CLN.pdf]

## Supplement

MEDLINE database-specific search strategy of randomized controlled trials comparing cannabinoids to placebo on patients with chronic non-cancer pain

1. exp pain/
2. exp chronic pain/
3. pain\$.mp.
4. (chronic or intractable or refractory or persistent).mp.
5. 1 or 3
6. 4 and 5
7. 2 or 6
8. fibromyalgia.mp.
9. fibrositis.mp.
10. arthriti\$.mp.
11. back pain.mp.
12. neck pain.mp.
13. exp musculoskeletal diseases/
14. exp joint diseases/
15. exp back pain/
16. exp multiple sclerosis/
17. multiple sclerosis.mp.
18. allodynia.mp.
19. sciatic\$.mp.
20. neuralgia.mp.
21. neuropath\$.mp.
22. or/7-21
23. cannabis.mp.
24. exp cannabis/
25. cannabinoid\$.mp.
26. exp cannabinoids/
27. tetrahydrocannabinol.mp.

28. exp dronabinol/
29. cannabidiol.mp.
30. exp cannabidiol/
31. sativex.mp.
32. exp medical marijuana/
33. nabiximols.mp.
34. thc.mp.
35. nabilone.mp.
36. cesamet.mp.
37. marinol.mp.
38. marihuana.mp.
39. marijuana.mp.
40. hashish.mp.
41. or/23-40
42. 22 and 41
43. randomized controlled trial.pt.
44. controlled clinical trial.pt.
45. randomized.ab.
46. placebo.ab.
47. drug therapy.fs.
48. randomly.ab.
49. trial.ab.
50. groups.ab.
51. or/43-50
52. 42 and 51
53. exp animals/ not humans/
54. 52 not 53
